1           **DeepMicrobes: taxonomic classification for**  
2                           **metagenomics with deep learning**

3

4           Qiaoxing Liang<sup>1</sup>, Paul W. Bible<sup>1,2</sup>, Yu Liu<sup>1</sup>, Bin Zou<sup>1</sup>, Lai Wei<sup>1,\*</sup>

5

6           <sup>1</sup>State Key Laboratory of Ophthalmology, Zhongshan Ophthalmic Center, Sun  
7           Yat-sen University, Guangzhou 510060, China.

8           <sup>2</sup>College of Arts and Sciences, Marian University, Indianapolis, IN 46222, USA.

9           \* Correspondence: weil9@mail.sysu.edu.cn

## 10 **Abstract**

11 Taxonomic classification is a crucial step for metagenomics applications  
12 including disease diagnostics, microbiome analyses, and outbreak tracing. Yet  
13 it is unknown what deep learning architecture can capture microbial genome-  
14 wide features relevant to this task. We report DeepMicrobes  
15 (<https://github.com/MicrobeLab/DeepMicrobes>), a computational framework  
16 that can perform large-scale training on > 10,000 RefSeq complete microbial  
17 genomes and accurately predict the species-of-origin of whole metagenome  
18 shotgun sequencing reads. We show the advantage of DeepMicrobes over  
19 state-of-the-art tools in precisely identifying species from microbial community  
20 sequencing data. Therefore, DeepMicrobes expands the toolbox of taxonomic  
21 classification for metagenomics and enables the development of further deep  
22 learning-based bioinformatics algorithms for microbial genomic sequence  
23 analysis.

## 24 **Introduction**

25 Shotgun metagenomic sequencing provides an unprecedented high-resolution  
26 insight into the critical roles of microorganisms in human health and  
27 environment<sup>1</sup>. One of the fundamental analysis steps in metagenomics is to  
28 assign individual reads to their species-of-origin. Unlike 16S rRNA sequencing  
29 data, which ignores more than 99% of the genomic sequences, taxonomic  
30 classification of whole genome shotgun sequencing data is more challenging  
31 and capacity demanding for machine learning algorithms. The models should  
32 learn genome-wide patterns during training, whereas only information from a  
33 short genomic fragment is available during application. Current taxonomic  
34 classification algorithms mainly utilize handcrafted sequence composition  
35 features such as oligonucleotide frequency<sup>2,3</sup>. However, they are either too slow  
36 to process large data sets or comparable to, if not worse than, traditional  
37 alignment in terms of precision and recall<sup>4</sup>. Additionally, the features used by  
38 these models are often too inflexible to meet the requirement of specific  
39 applications beyond their original narrow use cases.

40 Deep learning is a class of machine learning algorithms capable of  
41 modeling complex dependencies between input data (e.g., genomic fragments)  
42 and target variables (e.g., species-of-origin) in an end-to-end fashion. Thanks  
43 to graphical processing units (GPUs), deep learning-based bioinformatics tools  
44 can rapidly process large amounts of metagenomics sequencing data. We thus

45 hypothesize that deep learning can automatically discover taxonomic  
46 classification-relevant and genome-wide shared features appearing in short  
47 metagenomics sequencing reads given a well-designed deep neural network  
48 (DNN) architecture.

49 Deep learning has made tremendous recent advances in genomics<sup>5</sup>.  
50 Taking one-hot encoded DNA sequences as input, the DNNs that have been  
51 employed to genomic data fall into two major categories, convolutional neural  
52 networks (CNNs) and a hybrid of CNNs and recurrent neural networks (RNNs).  
53 For example, DeepSEA<sup>6</sup>, PrimateAI<sup>7</sup> and SpliceAI<sup>8</sup> used CNNs to predict the  
54 impact of genetic variation. Seq2species<sup>9</sup> also adopted CNNs to predict the  
55 species-of-origin of 16S data. DeeperBind<sup>10</sup> and DanQ<sup>11</sup> used hybrid  
56 architectures to predict transcription factor binding and DNA accessibility.  
57 Despite the success of these applications, it remains unknown what DNN  
58 architecture and DNA encoding method are suitable for taxonomic classification  
59 of metagenomics data.

60 Here we describe DeepMicrobes, a *k*-mer embedding-based recurrent  
61 network with attention mechanism (**Fig. 1a**). We trained the DNN on synthetic  
62 reads from RefSeq complete bacterial and archaeal genomes. The first layer of  
63 DeepMicrobes is designed to encode *k*-mers to dense vectors through  
64 embedding. The vectors are fed into a bidirectional long short-term memory  
65 network (BiLSTM) followed by self-attention and a multilayer perceptron (MLP).

66 DeepMicrobes surpasses other explored architectures both on synthetic and  
67 real sequencing data. Specifically, *k*-mer embedding rather than one-hot  
68 encoding boosts model performance. In addition, we show that our deep  
69 learning approach produces less false positive identifications than other  
70 taxonomic classification tools based on database searching.

71

## 72 **Results**

### 73 **A deep learning architecture for taxonomic classification**

74 To determine what kind of DNN is suitable for modeling the taxonomic  
75 signatures of shotgun metagenomic sequencing reads, we presented a  
76 systematic exploration of DNN architectures with different combinations of  
77 network architectural building blocks, DNA encoding schemes, and other  
78 hyperparameters. We used a curated RefSeq complete bacterial genome  
79 subset for model selection to release the computational burden of architecture  
80 searching (Methods). The training set consisted of simulated 100 bp reads in  
81 equal proportion from each species. To test the performance of these models,  
82 we created a synthetic data set consisted of 100,000 read pairs in equal  
83 proportion from 1,000 genomes (**Supplementary Table 1**). We used genome  
84 sequencing data sets from Sequence Read Archive (SRA) to evaluate their  
85 robustness on real data (**Supplementary Table 2-3**). We used confidence >  
86 50% as the threshold for classified reads.

87 To determine whether the deep learning architectures for other DNA  
88 sequence modeling tasks can be transferred to taxonomic classification, we  
89 respectively trained the models which are representatives of two major types of  
90 previously employed DNNs. We began with ResNet-like convolutional models,  
91 which achieved state-of-the-art performance in predicting the impact of  
92 mutations<sup>7,8</sup>. The convolutional models took as input one-hot encoded DNA  
93 sequences, and fed them into multiple stacking convolutional blocks (Methods).  
94 We varied the number of convolutional blocks and found that the model with six  
95 blocks achieved the highest area under the precision recall curve (AUPRC =  
96 0.055), followed by eight blocks (AUPRC = 0.052) on the synthetic data set (**Fig.**  
97 **1b**). Due to low-confidence predictions, the sensitivity and specificity of the  
98 model were closed to zero on the real data sets (**Fig. 1c and Supplementary**  
99 **Table 2-3**).

100 We next trained the hybrid architecture of CNN and RNN, which was proved  
101 to be effective in predicting transcription factor binding<sup>10,11</sup>. One-hot encoded  
102 DNA sequences were fed to a convolutional layer followed by BiLSTM  
103 (Methods). Despite its simplicity, the hybrid model (AUPRC = 0.115) surpassed  
104 the ResNet-like CNN (**Fig. 1b**). Also, the hybrid model achieved higher than 90%  
105 specificity for 16 out of 72 real sequencing data sets (**Fig. 1c and**  
106 **Supplementary Table 2**). Nonetheless, the sensitivity remained low due to the  
107 low prediction confidence (**Fig. 1c and Supplementary Table 3**).

108 Seq2species was an architecture designed for predicting species-of-origin  
109 of 16S data<sup>9</sup>. Taking one-hot encoded DNA vectors as input, seq2species used  
110 depthwise separable convolution as its main component. We retrained the  
111 model to assess whether this architecture could be transferred to shotgun  
112 metagenomic reads classification (Methods). It is worth noting that we used a  
113 batch size of 2,048 which performed better than 500 as of training on 16S data,  
114 suggesting the importance of larger batch size in metagenomic setting. In  
115 general, the performance of seq2species was only slightly better than the  
116 hybrid model both on the synthetic data (AUPRC = 0.120) and the real  
117 sequencing data (**Fig. 1b, c**). These results demonstrate that applying subtle  
118 variants of CNN or combination with RNN provides more performance boost  
119 than stacking a deeper CNN for shotgun metagenomic sequences classification.

120 The deep learning architectures above share the idea that a convolutional  
121 layer should be adopted as the first layers to locate pattern features from one-  
122 hot encoded DNA sequences. Indeed, CNNs excel in the recognition of motifs,  
123 which is helpful for predicting splicing site and *cis*-acting elements like promoter  
124 and enhancer. Notably, CNNs might not take into account the spatial ordering  
125 of local motifs, given the evidence from image classification<sup>12</sup>. This can have  
126 little impact on tasks where only the occurrence of a few nucleotides in a DNA  
127 sequence are the key to classification (e.g. transcription factor binding site  
128 detection). However, it is more complex to model taxonomic signatures, such

129 as single-nucleotide variants (SNVs), insertion–deletions (indels), and unique  
130 genes, especially for short microbial sequencing reads. Moreover, one-hot  
131 encoding has its own limitations. Apart from being sparse in information, one-  
132 hot approach encodes double strands of a DNA sequence into two unrelated  
133 matrices.

134 To overcome these limitations, we made an analogy between  $k$ -mers and  
135 words and used  $k$ -mer embedding to represent DNA sequences, which is  
136 common practice in natural language processing (NLP). Reverse complement  
137  $k$ -mers are treated as the same word (Methods). To determine the contribution  
138 of this encoding scheme to model performance, we trained an embedding-  
139 based baseline model whose only trainable parameters were the weights in the  
140 embedding layer (Methods). The preliminary experiments showed that the  
141 models performed better using longer  $k$ -mer, thus we chose the longest  $k$ -mer  
142 ( $k = 12$ ) whose vocabulary was able to fit in the memory of our GPUs.  
143 Interestingly, the baseline model (AUPRC = 0.877) outperformed the models  
144 taking one-hot encoded DNA as input (**Fig. 1b**). On the real sequencing data  
145 sets, the model assigned reads to the target species in > 90% specificity for 56  
146 data sets, and > 95% specificity for 39 data sets (**Fig. 1c and Supplementary**  
147 **Table 2**). Meanwhile, all the target species was successfully identified (**Fig. 1c**  
148 **and Supplementary Table 3**). This implies that the  $k$ -mer embedding layer is  
149 capable of embedding taxonomic attributes in each  $k$ -mer vector.



150 We next asked what types of neural networks were appropriate to learn  
151 useful information from *k*-mer embedding. To investigate this, we made two  
152 extensions on the baseline model by respectively adding a convolutional and  
153 BiLSTM layer after the *k*-mer embedding layer (Methods). Surprisingly, the  
154 embedding-based convolutional model was worse than the baseline model on  
155 the synthetic data (AUPRC = 0.809) and real genomic sequencing data in  
156 specificity ( $P < 6.7 \times 10^{-5}$ ) and sensitivity ( $P < 1.8 \times 10^{-22}$ ), though it contained  
157 more parameters in the convolutional layer (**Fig. 1b, c**). In contrast, the  
158 embedding-based recurrent model (AUPRC = 0.881) further increased the  
159 performance of the baseline on the real data in specificity ( $P < 1.1 \times 10^{-2}$ ) and  
160 sensitivity ( $P < 1.9 \times 10^{-4}$ ; **Fig. 1b, c**).

161 Self-attention is an attention mechanism capable of extracting relevant  
162 aspects from sentences with no need for additional information<sup>13</sup>. Inspired by  
163 its successful applications in a variety of NLP tasks, we applied self-attention  
164 mechanism on top of the BiLSTM of the embedding-based recurrent model to  
165 evaluate if this could further improve the model performance (Methods). Instead  
166 of directly taking the hidden state of the BiLSTM as features for the MLP, self-  
167 attention enabled the model to focus on specific regions of input DNA  
168 sequences, and generated sequence-level representation. Indeed, the model  
169 reached an AUPRC of 0.907 (**Fig. 1b**). When evaluated on the real sequencing  
170 data sets, the model also surpassed the embedding-based recurrent model

171 without self-attention mechanism in specificity ( $P < 1.2 \times 10^{-2}$ ) and sensitivity  
172 ( $P < 2.6 \times 10^{-14}$ ; **Fig. 1c**). This suggests that paying more attention to some  
173 specific parts of reads might help DNNs better model the unique features  
174 among short genomic sequences from different microorganisms. This deep  
175 learning architecture is selected and termed DeepMicrobes in the following  
176 studies (**Fig. 1a**).

177 To confirm the impact of embedding  $k$ -mer length, we trained a series of  
178 variant models of DeepMicrobes using  $k < 12$ . We observed that on the  
179 synthetic data the AUPRC increased from 0.255 ( $k = 8$ ) to 0.589 ( $k = 11$ ), and  
180 the trend was consistent on the real data (**Supplementary Fig. 1 and**  
181 **Supplementary Table 4-5**). These results support the potential of using even  
182 longer  $k$ -mer to improve the performance. Other architectures, such as  
183 hierarchical attention networks<sup>14</sup> and the Transformer<sup>15</sup> that entirely based on  
184 attention mechanisms, have potential in taking more advantage of the  
185 information in  $k$ -mer embedding. But they were too big to be trained on shotgun  
186 metagenomic reads classification task, by hindering the use of large batch sizes.  
187 Taken together, DeepMicrobes is the best feasible deep learning architecture  
188 in our problem setting.

189

190 **DeepMicrobes generalizes to different taxonomic ranks and read lengths**

191 To test the general applicability of DeepMicrobes on different taxonomic ranks,

192 we used the same architecture as species-level model to build the classifiers at  
193 the level of genus, family, order, class and phylum, respectively (Methods). We  
194 evaluated the six models on the synthetic data sets whose read lengths was  
195 different from the 100 bp training sets. As expected, when tested on the 100 bp  
196 data, the performance consistently increased from species to phylum, reaching  
197 an AUPRC of 0.951 at the genus level, and a nearly perfect AUPRC of 0.998  
198 at the phylum level (**Fig. 2a**). This probably resulted from reduced burden to  
199 the models in distinguishing similar taxa. The monotonically increasing pattern  
200 with taxonomic ranks retained for 150 bp and 200 bp test sets, while the 250  
201 bp and 300 bp test sets showed small fluctuation of AUPRC between 0.989 and  
202 0.995 (**Fig. 2a**). The species-level model performed better on longer sequences,  
203 with an AUPRC of 0.974 on the 150 bp data set (**Fig. 2a**). Interestingly, the  
204 models at the level higher than order tended to perform better on the read  
205 lengths similar to training sets. Nonetheless, the AUPRCs of these high-rank  
206 models were all above 0.99. These results indicate the overall robustness of  
207 DeepMicrobes on multiple taxonomic ranks and varying length of reads that  
208 were not seen during training.

209 Unlike traditional species classification approaches based on alignment, *k*-  
210 mer frequency or machine learning systems with hand engineered features, our  
211 deep neural network extracts novel, useful, and reusable features from the  
212 underlying data sets. We hypothesized that DeepMicrobes makes robust

213 predictions by extracting high-level features that are shared among hundreds-  
214 of-nucleotide fragments across the genomes of a taxon from primary  
215 metagenomic sequences. To test this hypothesis, we used a published mock  
216 community sample consisted of 11 species members from 7 genera<sup>16</sup>, and  
217 obtained the feature maps generated from the last hidden layer of the species-  
218 level model and genus-level model, respectively (Methods).

219 We then applied t-Distributed stochastic neighbor embedding (T-SNE)  
220 dimension reduction<sup>17</sup> to visualize a randomly drawn subset of the metagenome  
221 sample using these features (Methods). The sequencing reads originated from  
222 the same species clustered into unique groups (**Fig. 2b**). Furthermore, the  
223 distance between clusters could partly reflect the evolutionary relationships.  
224 Species of the same genus tended to be closer (**Fig. 2b**). *Escherichia coli* and  
225 *Salmonella enterica*, reported to share a supraspecies pangenome<sup>18</sup>, also  
226 showed this pattern (**Fig. 2b**). When using features extracted by the genus-  
227 level model, species of the same genus mixed together to form one big cluster  
228 (**Fig. 2b**). This pattern indicates that the characteristics of the learned features  
229 depend on the training target allowing for a flexible and tunable approach to  
230 extracting meaningful sequence features. Thus, DeepMicrobes could  
231 potentially extract more specific features that enable discrimination among  
232 even more similar taxa such as strain provided suitable training data is available.  
233 Notably, one of the species (and also genus) in the community,

234 *Paeniclostridium sordellii*, was excluded from the training sets due to  
235 incomplete genomes. Nonetheless, the taxon formed a distinguishable cluster  
236 both at the species and genus level (**Fig. 2b**), demonstrating the versatility of  
237 the high-level features in grouping microbial sequences from the same taxon  
238 as well as identifying novel organisms that were not part of the training data.

239

#### 240 **DeepMicrobes improves species identification by database searching**

241 Accurate species identification from metagenomics samples is a critical aspect  
242 of taxonomic classification. However, most database search tools for  
243 metagenomics only retain high precision and recall until the family level<sup>19</sup>. To  
244 test the advantage of our deep learning-based approach in species and genus  
245 identification, we analyzed the Critical Assessment of Metagenome  
246 Interpretation (CAMI) data sets<sup>19</sup> using DeepMicrobes and seven other  
247 taxonomic classification tools, including Kraken<sup>20</sup>, Kraken 2, Centrifuge<sup>21</sup>,  
248 CLARK<sup>22</sup>, CLARK-S<sup>23</sup>, Kaiju<sup>24</sup> and BLAST-MEGAN<sup>25</sup>. To this end, we trained  
249 DeepMicrobes to assign species label to reads using 10,857 RefSeq complete  
250 bacterial and archaeal genomes covering 3,640 species (Methods). Apart from  
251 the classification results generated using their pre-built reference databases if  
252 available, we also filtered the results to only consider the species shared by all  
253 reference databases or training set. This was to eliminate the effect of database  
254 setting on performance metrics, and focus on the algorithms.

255 We observed that DeepMicrobes substantially outperformed other tools in  
256 terms of precision at the species and genus level (**Fig. 2c and Supplementary**  
257 **Fig. 2**). For example, Kraken identified 1,754 more false positive species than  
258 DeepMicrobes from the medium-complexity sample, based on the filtered  
259 results. Specifically, DeepMicrobes identified less false positive species than  
260 BLAST-MEGAN regardless of the database setting. Meanwhile, DeepMicrobes  
261 classified reads faster than the other tools, except for Kraken and Kraken 2  
262 (**Supplementary Fig. 2**). In detail, when processing 100 bp reads,  
263 DeepMicrobes was 1.3 times faster than Centrifuge, and 519.9 times faster  
264 than BLAST-MEGAN, which was the second most precise tool. Notably, we  
265 used eight CPUs to run the other tools and one GPU to run DeepMicrobes.  
266 Moreover, since the number of reads that can be processed in parallel totally  
267 relies on available memory, the classification speed of DeepMicrobes has large  
268 room to improve given a more powerful GPU than the one used in this study.  
269 These results suggest that our deep learning approach has advantages over  
270 database searching, especially when false positives would strongly increase  
271 the cost in downstream efforts.

272

## 273 **Discussion**

274 In this study, we introduce DeepMicrobes, a deep learning architecture able to  
275 accurately predict the species-of-origin from primary shotgun metagenomic

276 sequencing reads. Although trained on simulated reads, it performed well on  
277 real data with sequences different from the genomes used for training. Including  
278 real sequencing reads might further improve the performance.

279       Effective taxonomic classification requires a distinct DNA encoding scheme  
280 and deep neural network architecture for precise genomic modeling tasks. We  
281 show that replacing one-hot encoding with  $k$ -mer embedding significantly  
282 boosts model performance. One likely reason for the improvement may be that  
283 taxonomic information is encoded by the  $k$ -mer representations in the  
284 embedding space. With this representation, difference between similar  
285 sequences originating from closely related species could be amplified. Finally,  
286 a pair of reverse complement DNA sequences consist of the same words, thus  
287 knowledge could be easily transferred between them. Interestingly,  $k$ -mer  
288 embedding has recently been showed to surpass one-hot encoding in  
289 predicting transcription factor binding<sup>26</sup>. This suggests the general applicability  
290 of  $k$ -mer embedding in other biological fields.

291       Our finding that RNNs surpass CNNs in taxonomic classification highlights  
292 the importance of order and context of oligonucleotides in taxonomic  
293 classification. CNNs and  $k$ -mer exact alignments only take into account the  
294 presence of specific oligonucleotides, while early machine learning-based  
295 taxonomic classifiers employed their frequency as features. In contrast,  
296 BiLSTM understands a  $k$ -mer better with the help of knowledge learned from

297 the previous and next  $k$ -mer. Hence, ordering and contextual information are  
298 retained and passed to the next layer.

299 To our knowledge, DeepMicrobes is the first deep learning architecture that  
300 incorporates attention mechanisms in DNA sequences analysis. Apart from a  
301 performance boost, attention scores provide an easy way to visualize what  
302 parts of the DNA sequences contribute most to prediction. This characteristic  
303 makes algorithm more interpretable than perturbation-based and  
304 backpropagation-based approaches opening the possibility of exploring the  
305 biological meaning of the extracted features in contrast to black-box prediction  
306 algorithms.

307 DeepMicrobes provides a novel tool and information source for taxonomy  
308 identification and expands the repertoire of metagenome analysis methods.  
309 Unlike algorithms based on read mapping, discriminative  $k$ -mer, or sequence  
310 composition, DeepMicrobes extracts task-relevant features from DNA  
311 sequences using a deep neural network learning architecture. Notably, the  $k$ -  
312 mer length we recommend is far from being discriminative among species as  
313 is the case of Kraken, CLARK, and Centrifuge. Current binning methods using  
314 sequence compositions as features typically perform well on long contigs.  
315 However, we show that the sequences as short as 100 bp formed separable  
316 clusters using high-level features extracted by DNNs. The feature type  
317 generated by supervised learning depends on training targets, which is more



318 focused and task-relevant than auto-encoder methods<sup>27</sup>. Future researches  
319 might investigate how to utilize these features, and also incorporate them with  
320 co-occurrence or coverage information to build a powerful metagenome binning  
321 tool.

322 We demonstrate that DeepMicrobes is capable of discovering microbial  
323 genome-wide features appearing in short genomic fragments. Apart from  
324 general microbiome analysis, taxonomic classification is also useful in other  
325 scenarios such as outbreak tracing, pathogen identification, and virulence  
326 prediction. Given the flexibility and expressiveness of deep learning modeling  
327 techniques, DeepMicrobes might be easily transferred to these tasks by shifting  
328 training sets. For example, predicting the source of food-borne disease would  
329 require the deep learning model to be trained on whole-genome sequencing  
330 data of *Salmonella enterica* collected from different hosts<sup>28</sup>. We believe that  
331 DeepMicrobes will be of benefit for development of deep learning-based  
332 bioinformatics tools that are able to extract new insights from the exponentially  
333 increasing amount of microbial genomic sequencing data.

334

## 335 **Methods**

### 336 **Data sets for model training**

337 Source genomes for training were collected from National Center for  
338 Biotechnology Information (NCBI) reference sequences (RefSeq) bacterial and

339 archaeal genome database (downloaded on 2018-11-30). Training sets were  
340 constructed by simulating sequencing reads from complete genomes using  
341 wgsim in the SAMtools software package<sup>29</sup>. We simulated 100 bp error-free  
342 reads in equal proportion for each species. The number of reads to simulate  
343 depended on how many training steps were required for models to converge.  
344 Apart from sampling from both strands of genomes, we also included the  
345 reverse complement reads in the training set. Each read was given a numerical  
346 label based on NCBI taxonomy IDs at the species level (more details provided  
347 with the source code at <https://github.com/MicrobeLab/DeepMicrobes>). The  
348 reads for training at other taxonomic ranks (phylum, class, order, family, and  
349 genus) were labeled at that specific rank.

350 The species included in the training set for model selection was required to  
351 contain at least one genome of a strain at the reference or representative  
352 assembly level of quality in the RefSeq database. We drew one genome as  
353 representative for each species. This training set was also used to train the  
354 variants of DeepMicrobes at different taxonomic level  
355 (<https://github.com/MicrobeLab/DeepMicrobes>). The full training set used to  
356 train the model for comparison with other taxonomic classifiers contained  
357 filtered RefSeq bacterial and archaeal species. We first screened the similar  
358 pairs of species using the tetranucleotide signature correlation index  
359 implemented by pyani<sup>30</sup> (<http://widdowquinn.github.io/pyani>). We next

360 computed the average nucleotide identity (ANI) between these species pairs  
361 whose tetranucleotide signature correlation index  $> 0.99$ <sup>31</sup> using a window size  
362 of 100 bp. If  $> 80\%$  coverage of the genomes of a species showed an ANI  $>$   
363 95%, the species was excluded from training. This resulted in 10,857 genomes  
364 of 3,640 species. Full list of the genomes and species is available at  
365 <https://github.com/MicrobeLab/DeepMicrobes>.

366

### 367 **Data sets for model selection**

368 We created an evaluation set consisting of 10,000 100 bp reads for each  
369 species, which was simulated using wgsim with a random seed different from  
370 the one used to generate the training sets. This evaluation set was used to  
371 search for optimal hyperparameters and decide when to stop training. This data  
372 set was not seen during training to protect against overfitting the model. We  
373 used Mason read simulator<sup>32</sup> to create the synthetic test set from 1,000  
374 bacterial genomes (**Supplementary Table 1**). Before genome fragmentation, a  
375 SNP rate of 0.1% and an indel rate of 0.1% were injected in genomes. In  
376 addition, an indel rate of 0.1% and a mutation rate of 0.4% were injected in the  
377 reads. We simulated equal proportion of 100 bp read pairs for each genome,  
378 and benchmarked the models with different architectures on this data set with  
379 100,000 reads. We also created the data sets in 150 bp, 200 bp, 250 bp, and  
380 300 bp, which are common lengths for next-generation sequencing reads. The

381 data sets used to evaluate model performance at different taxonomic ranks  
382 were the same, except for the true labels were given at the target rank. We  
383 downloaded 72 bacterial genome sequencing samples from the Sequence  
384 Read Archive (SRA) at NCBI (**Supplementary Table 2**). We filtered reads  
385 shorter than 100 bp after quality control, and truncated longer reads to 100 bp.

386

### 387 **Representation of DNA sequences**

388 We adopted two strategies to encode DNA sequences into numeric matrices,  
389 namely one-hot encoding and  $k$ -mer embedding. For one-hot encoding we  
390 converted DNA into  $4 \times L$  matrix, where A = [1, 0, 0, 0], C = [0, 1, 0, 0], G = [0,  
391 0, 1, 0] and T = [0, 0, 0, 1]. For  $k$ -mer embedding, we split a DNA sequence of  
392 length  $L$  into a list of substrings of length  $K$  with a stride of  $S$ . We used a stride  
393 of one for the final model, ending up with  $L - K + 1$  substrings. The length of  $K$   
394 was chosen to reach balance between the model's fitting capacity and  
395 computational resources since the vocabulary size grows exponentially in  $K$  by  
396  $4^K$  (**Supplementary Table 6**). We used 12-mers unless otherwise stated. The  
397  $k$ -mer vocabulary was constructed using Jellyfish. We only retained canonical  
398  $k$ -mers as representatives (-C parameter of Jellyfish), which downsized the  
399 vocabulary (**Supplementary Table 6**). We included a word symbol <unk> in  
400 the vocabulary to represent  $k$ -mers with Ns. Each  $k$ -mer was further encoded  
401 as a zero-based integer according to its lexical order in the vocabulary. These

402 integers then served as indexes for the word embedding layer.

403

#### 404 **Model architectures**

##### 405 *Convolutional model*

406 The ResNet<sup>33</sup>-like CNN took as input the one-hot encoded DNA sequences.

407 The architecture started with one layer of convolutions, followed by a stack of

408 shortcut connected ResNet-like temporal convolutional blocks. One

409 convolutional block consisted of two convolutional layers, each followed by a

410 layer of batch normalization and activation. A pooling layer was inserted every

411 two convolutional blocks. This resulted in a DNN with  $1 + 2N$  convolutional

412 layers, where  $N$  is the number of convolutional blocks. Unless otherwise stated,

413 we used MLP as a classifier for species label prediction, which was also the

414 case of the other models.

415

##### 416 *Hybrid convolutional and recurrent model*

417 DNA sequences were input as one-hot matrices. The models began with one

418 convolutional layer and one pooling layer, followed by BiLSTM.

419

##### 420 *Seq2species*

421 We used the hyperparameters of Seq2species optimized for 100 bp reads<sup>9</sup>,

422 except that the number of nodes in the output layer was changed to the number

423 of species in our setting. To train the model, we used the code available at  
424 <https://github.com/tensorflow/models/tree/master/research/seq2species>. To  
425 benchmark running time and other performance metrics, we adapted the code  
426 to our input and output pipelines without changing the code related to the model  
427 architecture (<https://github.com/MicrobeLab/DeepMicrobes>).

428

#### 429 *Embedding baseline*

430 The  $k$ -mer embedding layer learned a mapping from each  $k$ -mer index to an  
431 embedding vector. We randomly initialized the parameters in the embedding  
432 layer. Before the fully connected layers, we performed max pooling and  
433 average pooling over the dimension of token length of the embedding matrix  
434 and concatenated together the two feature vectors.

435

#### 436 *Embedding-based convolutional model*

437 We extended the embedding baseline model by adding a convolutional layer  
438 after the embedding layer. The 1D convolution kernel was convolved with the  
439 input embedding matrix over the dimension of token length. In addition to  
440 convolutional layer with one fixed filter width, the feature maps generated by  
441 convolutional layers with multiple filter widths could also be concatenated. We  
442 optionally applied an over-time pooling over the features before feeding them  
443 to the MLP.

444

445 *Embedding-based recurrent model*

446 We applied a BiLSTM over the embedding vector of each  $k$ -mer. Similar to the  
447 convolution extension, we also tried different types of pooling operation over  
448 the hidden states generated by the BiLSTM. Alternatively, the hidden states  
449 were directly fed to the MLP.

450

451 *Embedding-based recurrent self-attention model*

452 The summation vectors generated by the self-attention operation were used to  
453 weight LSTM hidden states. The attention vector was softmax normalized so  
454 as to ensure all the weights summed up to one. Multiple rows of attention were  
455 used to focus on multiple aspects of the DNA sequences that reflected  
456 taxonomic signatures. For downstream classification task, the self-attention  
457 weighted hidden states were fed to the MLP.

458

459 **Model training and evaluation metrics**

460 The DNNs were implemented using TensorFlow framework. We used NVIDIA  
461 Tesla P40 24GB GPU to accelerate computation. The training set was only  
462 seen by the models for one time (i.e., epoch = 1). We trained the models till  
463 they converged on the evaluation set. Reads in fasta or fastq format were  
464 converted to the TensorFlow format TFRecord before loading into the models.

465 For each architecture of DNN, we performed random search to pick the  
466 optimal combination of hyperparameters. In detail, we randomly sampled 30  
467 candidate hyperparameters setting from the search space (**Supplementary**  
468 **Table 7**) and picked the models which performed best on the evaluation set.  
469 We used micro-averaging AUPRC to evaluate model performance on the  
470 synthetic test sets. Sensitivity and specificity were used to measure the  
471 performance of models on the genome sequencing data sets. Here sensitivity  
472 is defined as the proportion of correctly classified reads out of the total number  
473 of reads in the sample, and specificity is defined as the proportion of correctly  
474 classified reads among all reads classified. The statistical difference was  
475 measured by paired t-test.

476

#### 477 **Comparison of DeepMicrobes with other taxonomic classifiers**

478 We compared the performance of DeepMicrobes with Kraken, Kraken 2,  
479 Centrifuge, CLARK, CLARK-S, Kaiju and BLAST-MEGAN, using the CAMI data  
480 sets. These tools were run with default options. The tools were run in paired-  
481 end mode, except for BLAST-MEGAN. For paired-end data we averaged the  
482 softmax probability distributions generated by DeepMicrobes for two ends of  
483 reads. We ran Kraken (v1.0) using the pre-built MiniKraken 8GB database  
484 included complete bacterial, archaeal, and viral genomes in RefSeq (as of Oct.  
485 18, 2017). We ran Kraken 2 (v2.0.6) using pre-built MiniKraken2 v1 8GB



486 database including RefSeq bacteria, archaea, and viral libraries (available on  
487 Apr. 23, 2019). Centrifuge (v1.0.3) was run using pre-built reference database,  
488 which was compressed prokaryotic database containing bacteria and archaea  
489 (updated on Apr. 15, 2018). The bacteria (and archaea) database for CLARK  
490 and CLARK-S (v1.2.5) was downloaded via the set\_targets.sh script (on Aug.  
491 25, 2018). Kaiju (v1.5.0) was run using pre-built microbial subset of the NCBI  
492 nr database (as of May. 16, 2017). To run MEGAN, we first queried unpaired  
493 reads using BLAST executable (v2.6.0+) against nt index downloaded from  
494 NCBI (on Aug. 25, 2018). We used the Megablast mode and an e-value of 1e-  
495 20. Next, we ran MEGAN (V5.3.11) to summarize the lowest common ancestor  
496 (LCA) taxon for each read.

497 Speed was evaluated using 8 threads on the same computer.  
498 DeepMicrobes was run with 8 threads on CPU for input pipeline, and 1 GPU for  
499 prediction using a batch size of 20,000. The data used for speed evaluation has  
500 1,000,000 reads in 100 bp. We computed the precision and recall for species  
501 and genus identification for each tool, demanding at least one supporting reads  
502 for the presence of a taxon. Precision refers to the fraction of taxon identified  
503 by an analysis tool that is actually present. Recall refers to the fraction of  
504 expected taxon that is identified by a tool. The reads whose prediction  
505 confidence > 50% were treated as being classified at the species level. Reads  
506 with confidence > 45% were treated as classified at the genus of that species.

507

## 508 **Reads clustering using high-level features extracted by DNN**

509 We downloaded the mock community sequencing sample from SRA using  
510 accession SRR2081071. The identity of each read was confirmed by running  
511 BLAST against nt database. For each species included in training, we randomly  
512 sampled 100 reads that were correctly classified by DeepMicrobes. For the  
513 species not included we randomly sampled 100 reads from those confirmed via  
514 BLAST. We used T-SNE to visualize the feature map generated by the last  
515 hidden layer of MLP. Before running T-SNE, we used principal component  
516 analysis (PCA) to reduce the features into 150 dimensions explaining > 90% of  
517 the variation.

518

## 519 **Code availability**

520 The DeepMicrobes program, trained model parameters, hyperparameters and  
521 the implementation of the other DNN architectures are provided at GitHub  
522 (<https://github.com/MicrobeLab/DeepMicrobes>).

523

## 524 **Acknowledgements**

525 We thank all members of the Wei Laboratory for their support and discussion.  
526 This work was supported by the National Basic Research Program of China  
527 2015CB964601 and the National Natural Science Foundation of China

528 81570828.

529

### 530 **Author contributions**

531 L.W. conceived the study; Q.L. and L.W. designed the research; Q.L., P.W.B.,  
532 Y.L., and B.Z. performed the research; Q.L. and Y.L. analyzed data; P.W.B. and  
533 B.Z. contributed analytic tools; Q.L. and P.W.B. drafted the manuscript. All  
534 authors read and approved the final version of the manuscript.

535

### 536 **Competing interests**

537 No potential conflict of interest relevant to this article was reported.

538

### 539 **References**

- 540 1. Quince, C., Walker, A. W., Simpson, J. T., Loman, N. J. & Segata, N.  
541 Shotgun metagenomics, from sampling to analysis. *Nat. Biotechnol.* **35**,  
542 833–844 (2017).
- 543 2. Rosen, G. L., Reichenberger, E. R. & Rosenfeld, A. M. NBC: The naïve  
544 Bayes classification tool webserver for taxonomic classification of  
545 metagenomic reads. *Bioinformatics* **27**, 127–129 (2011).
- 546 3. Vervier, K., Mahé, P., Tournoud, M., Veyrieras, J. B. & Vert, J. P. Large-  
547 scale machine learning for metagenomics sequence classification.  
548 *Bioinformatics* **32**, 1023–1032 (2016).
- 549 4. McIntyre, A. B. R. *et al.* Comprehensive benchmarking and ensemble  
550 approaches for metagenomic classifiers. *Genome Biol.* **18**, 182–200  
551 (2017).
- 552 5. Eraslan, G., Avsec, Ž., Gagneur, J. & Theis, F. J. Deep learning: new

- 553 computational modelling techniques for genomics. *Nat. Rev. Genet.* **20**,  
554 389–403 (2019).
- 555 6. Zhou, J. & Troyanskaya, O. G. Predicting effects of noncoding variants  
556 with deep learning–based sequence model. *Nat. Methods* **12**, 931–934  
557 (2015).
- 558 7. Sundaram, L. *et al.* Predicting the clinical impact of human mutation with  
559 deep neural networks. *Nat. Genet.* **50**, 1161–1170 (2018).
- 560 8. Jaganathan, K. *et al.* Predicting splicing from primary sequence with deep  
561 learning. *Cell* **176**, 535–548 (2019).
- 562 9. Busia, A. *et al.* A deep learning approach to pattern recognition for short  
563 DNA sequences. *Preprint at bioRxiv* <https://doi.org/10.1101/353474>  
564 (2019).
- 565 10. Hassanzadeh, H. R. & Wang, M. D. DeeperBind: enhancing prediction of  
566 sequence specificities of DNA binding proteins. in *2016 IEEE*  
567 *International Conference on Bioinformatics and Biomedicine (BIBM)*  
568 178–183 (IEEE, 2016). doi:10.1109/BIBM.2016.7822515
- 569 11. Quang, D. & Xie, X. DanQ: a hybrid convolutional and recurrent deep  
570 neural network for quantifying the function of DNA sequences. *Nucleic*  
571 *Acids Res.* **44**, e107 (2016).
- 572 12. Brendel, W. & Bethge, M. Approximating CNNs with bag-of-local-features  
573 models works surprisingly well on ImageNet. in *7th International*  
574 *Conference on Learning Representations (ICLR 2019)* (2019).
- 575 13. Lin, Z. *et al.* A structured self-attentive sentence embedding. in *5th*  
576 *International Conference on Learning Representations (ICLR 2017)*  
577 (2017).
- 578 14. Sinha, K., Dong, Y., Cheung, J. C. K. & Ruths, D. A hierarchical neural  
579 attention-based text classifier. in *Proceedings of the 2018 Conference on*  
580 *Empirical Methods in Natural Language Processing* 817–823 (2018).

- 581 15. Vaswani, A. *et al.* Attention is all you need. in *31st Conference on Neural*  
582 *Information Processing Systems (NIPS 2017)* (2017).
- 583 16. Jovel, J. *et al.* Characterization of the gut microbiome using 16S or  
584 shotgun metagenomics. *Front. Microbiol.* **7**, (2016).
- 585 17. Laurens van der Maaten & Geoffrey E., H. Visualizing data using t-SNE.  
586 *J. Mach. Learn. Res.* **164**, 2579–2605 (2008).
- 587 18. Karberg, K. A., Olsen, G. J. & Davis, J. J. Similarity of genes horizontally  
588 acquired by *Escherichia coli* and *Salmonella enterica* is evidence of a  
589 supraspecies pangenome. *Proc. Natl. Acad. Sci.* **108**, 20154–20159  
590 (2011).
- 591 19. Sczyrba, A. *et al.* Critical Assessment of Metagenome Interpretation - A  
592 benchmark of metagenomics software. *Nat. Methods* **14**, 1063–1071  
593 (2017).
- 594 20. Wood, D. E. & Salzberg, S. L. Kraken: ultrafast metagenomic sequence  
595 classification using exact alignments. *Genome Biol.* **15**, R46 (2014).
- 596 21. Kim, D., Song, L., Breitwieser, F. P. & Salzberg, S. L. Centrifuge: rapid  
597 and sensitive classification of metagenomic sequences. *Genome Res.* **26**,  
598 1721–1729 (2016).
- 599 22. Ounit, R., Wanamaker, S., Close, T. J. & Lonardi, S. CLARK: fast and  
600 accurate classification of metagenomic and genomic sequences using  
601 discriminative k-mers. *BMC Genomics* **16**, 236 (2015).
- 602 23. Ounit, R. & Lonardi, S. Higher classification sensitivity of short  
603 metagenomic reads with CLARK-S. *Bioinformatics* **32**, 3823–3825  
604 (2016).
- 605 24. Menzel, P., Ng, K. L. & Krogh, A. Fast and sensitive taxonomic  
606 classification for metagenomics with Kaiju. *Nat. Commun.* **7**, 11257–  
607 11265 (2016).
- 608 25. Huson, D. H. *et al.* MEGAN Community Edition - Interactive exploration

- 609 and analysis of large-scale microbiome sequencing data. *PLoS Comput.*  
610 *Biol.* **12**, e1004957 (2016).
- 611 26. Shen, Z., Bao, W. & Huang, D.-S. Recurrent neural network for predicting  
612 transcription factor binding sites. *Sci. Rep.* **8**, 15270 (2018).
- 613 27. Nissen, J. N. *et al.* Binning microbial genomes using deep learning.  
614 *Preprint at bioRxiv* <https://doi.org/10.1101/490078> (2018).
- 615 28. Wheeler, N. E. Tracing outbreaks with machine learning. *Nat. Rev.*  
616 *Microbiol.* **17**, 269 (2019).
- 617 29. Li, H. *et al.* The Sequence Alignment/Map format and SAMtools.  
618 *Bioinformatics* **25**, 2078–2079 (2009).
- 619 30. Pritchard, L., Glover, R. H., Humphris, S., Elphinstone, J. G. & Toth, I. K.  
620 Genomics and taxonomy in diagnostics for food security: Soft-rotting  
621 enterobacterial plant pathogens. *Anal. Methods* **8**, 12–24 (2016).
- 622 31. Richter, M. & Rosselló-Móra, R. Shifting the genomic gold standard for  
623 the prokaryotic species definition. *Proc. Natl. Acad. Sci.* **106**, 19126–  
624 19131 (2009).
- 625 32. Holtgrewe, M. Mason – a read simulator for second generation  
626 sequencing data. *Tech. Rep. FU Berlin* 18 (2010).
- 627 33. He, K., Zhang, X., Ren, S. & Sun, J. Deep residual learning for image  
628 recognition. in *2016 IEEE Conference on Computer Vision and Pattern*  
629 *Recognition (CVPR)* 770–778 (IEEE, 2016). doi:10.1109/CVPR.2016.90

## Figure 1

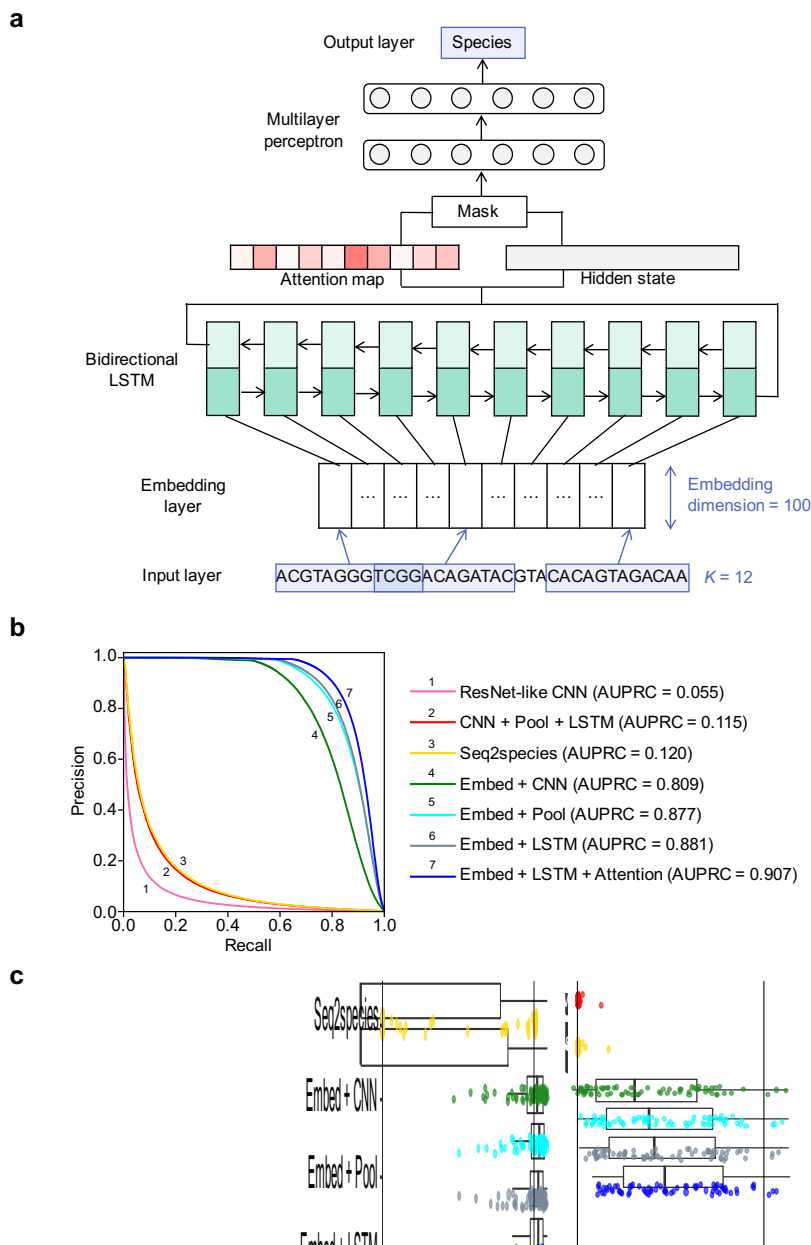

**Figure 1. The architecture of DeepMicrobes and the performance of different DNN methods**

(a) The deep learning architecture of DeepMicrobes. (b) The AUPRC of different models on the synthetic test set consists of reads from 1,000 microbial genomes in equal proportion. (c) The specificity (left) and sensitivity (right) of different models on the genome sequencing data. ResNet-like CNN, a convolutional model; CNN + Pool + LSTM, a hybrid convolutional and recurrent model; Seq2species, a previously proposed architecture for 16S data; Embed + CNN, an embedding-based convolutional model; Embed + Pool, an embedding baseline; Embed + LSTM, an embedding-based recurrent model; Embedding + LSTM + Attention, an embedding-based recurrent self-attention model, which is selected for DeepMicrobes.

**Figure 2**

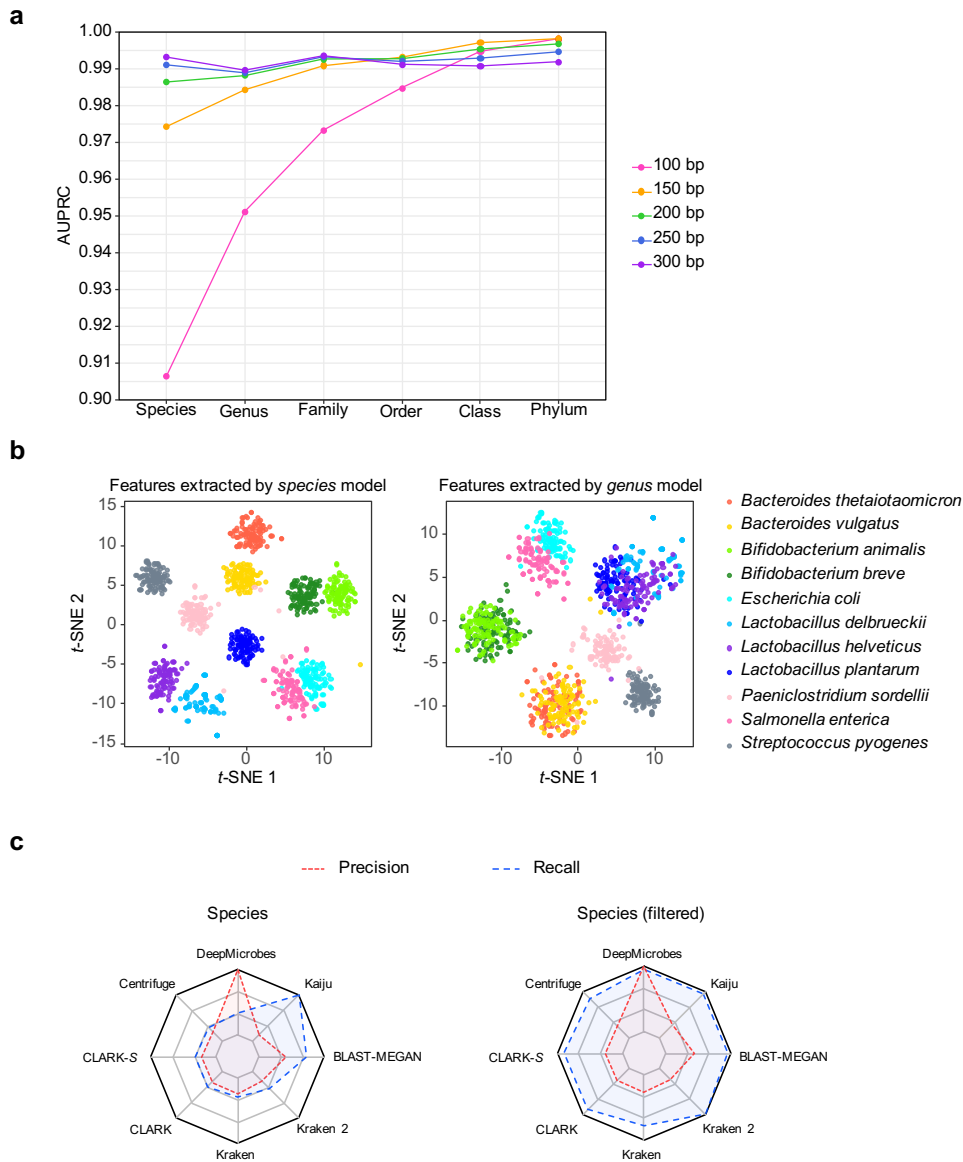

**Figure 2. Generalization of DeepMicrobes to different taxonomic ranks, and comparison of DeepMicrobes with state-of-the-art tools**

(a) The test performance of DeepMicrobes taxonomic-rank variants on reads of different lengths. We used the synthetic test sets containing reads from 1,000 genomes in equal proportion. Each model variant was trained on 100 bp reads, and tested on 100 bp (magenta), 150 bp (orange), 200 bp (green), 250 bp (blue), and 300 bp (purple) reads. (b) T-SNE visualization of the mock community reads using high-level feature maps generated by DeepMicrobes trained at the species (left) and genus (level) level. (c) Relative precision and recall of the medium-complexity CAMI data set at the species level, computed on the basis of default (left) and shared-species filtered (right) results. Metrics were normalized by the maximal value.



## Supplementary Figure 1

**a**

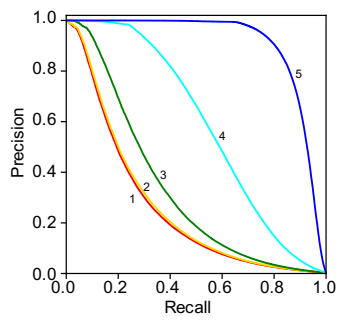

- 1 Embed (8-mer) + LSTM + Attention (AUPRC = 0.255)
- 2 Embed (9-mer) + LSTM + Attention (AUPRC = 0.263)
- 3 Embed (10-mer) + LSTM + Attention (AUPRC = 0.331)
- 4 Embed (11-mer) + LSTM + Attention (AUPRC = 0.589)
- 5 Embed (12-mer) + LSTM + Attention (AUPRC = 0.907)

**b**

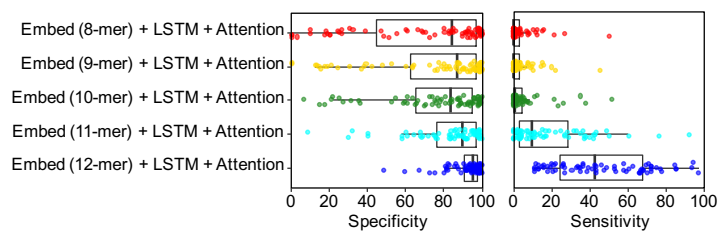

### Supplementary Figure 1. The effect of *k*-mer length on model performance

(a) The AUPRC of DeepMicrobes variants using different *k*-mer lengths. The AUPRC was computed on the synthetic test set consisting of reads from 1,000 microbial genomes in equal proportion. The DNA sequences were split into a list of 8-mer, 9-mer, 10-mer, 11-mer and 12-mer, respectively. All model hyperparameters were the same except for the vocabulary size. (b) The specificity (left) and sensitivity (right) of DeepMicrobes *k*-mer variants on the genome sequencing data.

## Supplementary Figure 2

**a**

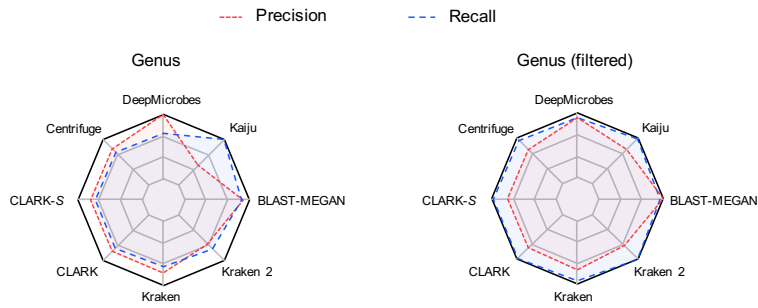

**b**

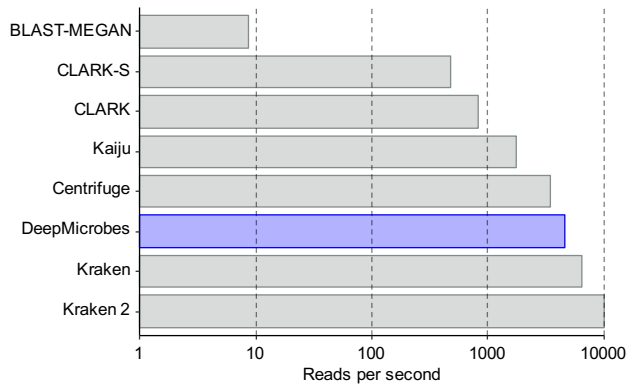

### Supplementary Figure 2. The genus-level comparison of DeepMicrobes with state-of-the-art tools and speed evaluation

(a) Relative precision and recall of the medium-complexity CAMI data set at the genus level, computed on the basis of default (left) and shared-genus filtered (right) results. Metrics were normalized by the maximal value. (b) Speed comparison of classification programs for 1,000,000 single-end 100 bp reads. DeepMicrobes was run using a batch size of 20,000. The time of DeepMicrobes included converting fasta sequences to TFRecord and making predictions.

**Supplementary Table 1.** Assembly summary of the 1,000 genomes used to create the synthetic test set

**Supplementary Table 2.** Specificity of different deep learning architectures on the genome sequencing data set

**Supplementary Table 3.** Sensitivity of different deep learning architectures on the genome sequencing data set

**Supplementary Table 4.** Specificity of DeepMicrobes *k*-mer variants on the genome sequencing data set

**Supplementary Table 5.** Sensitivity of DeepMicrobes *k*-mer variants on the genome sequencing data set

**Supplementary Table 6. The effect of *k*-mer length on vocabulary size**

| Length of <i>k</i> -mers | # of all possible <i>k</i> -mers ( $4^k$ ) | # of merged <i>k</i> -mers (vocabulary size) |
|--------------------------|--------------------------------------------|----------------------------------------------|
| 8                        | 65,536                                     | 32,896                                       |
| 9                        | 262,144                                    | 131,072                                      |
| 10                       | 1,048,576                                  | 524,800                                      |
| 11                       | 4,194,304                                  | 2,097,152                                    |
| 12                       | 16,777,216                                 | 8,390,656                                    |

**Supplementary Table 7. The search space of hyperparameters**

| Hyperparameters                    | Search space                                               |
|------------------------------------|------------------------------------------------------------|
| Number of CNN filters              | 64, 128, 256, 320, 512, 1024                               |
| Size of CNN filters                | 3, 4, 5, 6, 13, 26, 30, concatenate                        |
| Number of residual block           | 1, 2, 3, 4                                                 |
| LSTM dimension (in each direction) | 256, 300, 320, 400, 512, 600, 640, 1024                    |
| Number of LSTM layers              | 1, 2                                                       |
| Number of FC layers                | 1, 2, 3                                                    |
| Number of FC units                 | 150, 350, 512, 1024, 2048, 3000, 4000, 4096                |
| Type of pooling                    | Max, average, concatenate, none                            |
| Window size of pooling             | 2, 13, 15, length of input sequence (for embedding models) |
| Pooling stride                     | 13, 15                                                     |
| Number of attention rows           | 10, 20, 30, 40, 50                                         |
| Penalization coefficient           | 0, 1e-5, 1e-4, 1e-3, 0.01, 0.1, 0.2, 0.5, 0.8, 1           |
| Batch size                         | 128, 256, 500, 512, 1024, 2048, 3000, 4000, 4096           |
| Learning rate                      | 0.05, 0.01, 5e-3, 1e-3, 5e-4, 1e-4                         |
| Decay rate (for learning rate)     | 1e-3, 5e-3, 0.01, 0.05, 0.1, 0.5                           |
| Dropout (keep probability)         | 0.5, 0.6, 0.7, 0.8, 0.9, 0.95, 0.99, 1.0                   |
| L2 regularization                  | 1e-5, 1e-4, 1e-3, 0.01, 0.1, none                          |
| Activation function                | ReLu, tanh, Leaky Relu                                     |
| Optimizer                          | Adam, Adagrad                                              |
| Encoding method                    | One-hot, $k$ -mer embedding                                |
| $K$ -mer length                    | 7, 8, 9, 10, 11, 12                                        |
| $K$ -mer redundancy                | $4^k$ , merged                                             |
| Embedding dimension                | 50, 100, 200, 300                                          |
| Embedding stride                   | 1, 2, 3                                                    |
| Embedding weights initialization   | Random, pre-trained GloVe vectors                          |
